# Supplementary material
Source: PubMed Central journal article supplement (PMC5753037)
Supplement: EMBJ-37-122-s001.pdf [file EMBJ-37-122-s001.pdf]

## Expanded View Figures

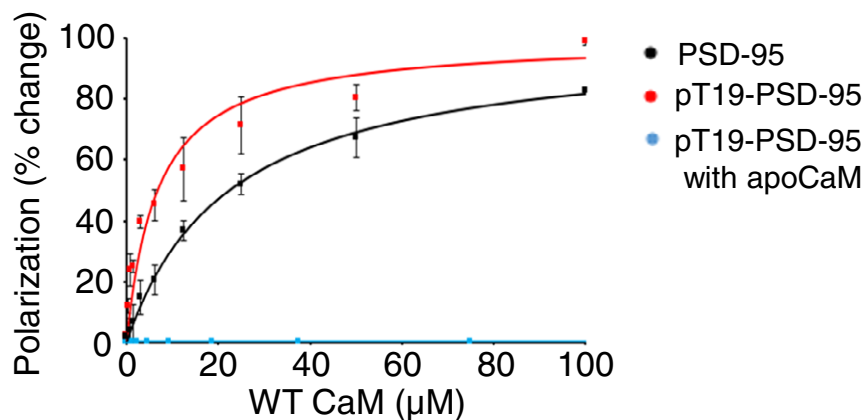

**Figure EV1. Titration of PSD-95 peptide with  $\text{Ca}^{2+}/\text{CaM}$ .**

Fluorescently labeled PSD-95 peptides (residues 1–21), which were either phosphorylated (red, blue) or unphosphorylated on T19 (black), were titrated with increasing amounts of  $\text{Ca}^{2+}/\text{CaM}$  (black, red) or apoCaM (blue) and fluorescence polarization (FP) monitored. Basal levels of FP obtained in the absence of  $\text{Ca}^{2+}/\text{CaM}$  were determined for each titration and subtracted. Mean values from three independent titrations ( $\pm$  SD) are indicated and fitted to a one-site binding model (see Materials and Methods). Solid lines represent theoretical FP values calculated using a one-site binding model as described in Materials and Methods. Calculated dissociation constants are given in Table 1.

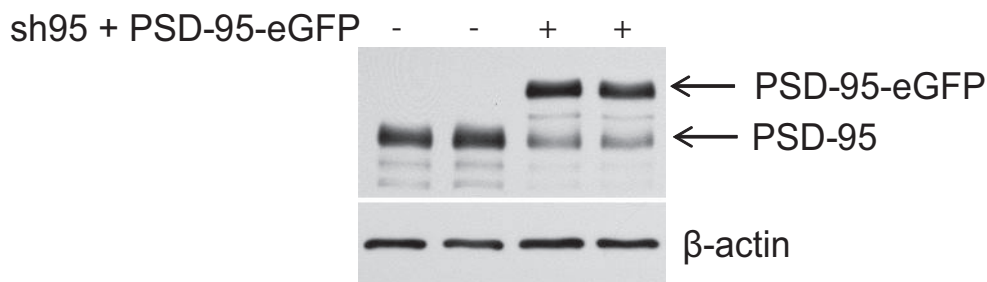

**Figure EV2. Molecular replacement of PSD-95.**

Cultured cortical neurons were infected at 12 DIV with lentivirus for expression of both shRNA against PSD-95 (sh95) and sh-resistant PSD-95-EGFP. Cultures were extracted at 17 DIV for immunoblotting with an antibody against PSD-95. Endogenous PSD-95 was detected at ~90 kDa and ectopically expressed GFP-tagged PSD-95 ~130 kDa. Probing for  $\beta$ -actin at around 43 kDa showed equal loading.

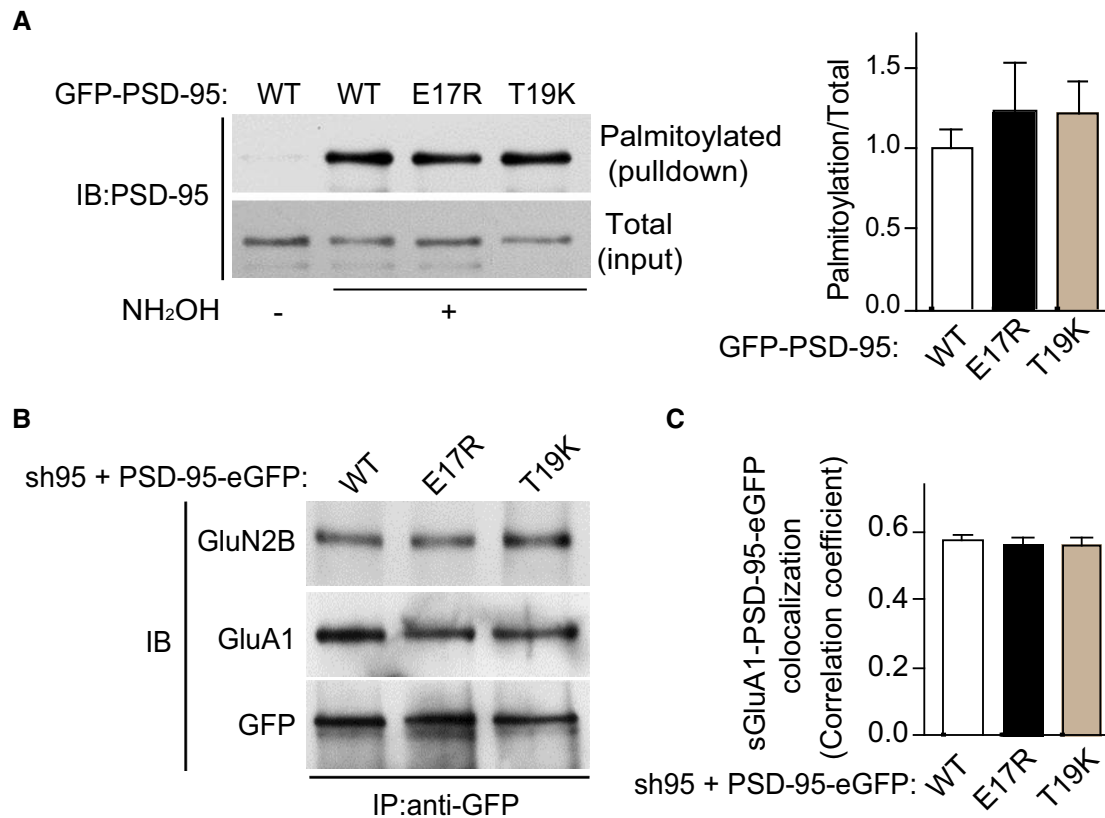

**Figure EV3. Palmitoylation and association of PSD-95 with AMPARs and NMDARs are not affected by the E17R and T19K mutations.**

- A** HEK293 cells were transfected with PSD-95-EGFP cDNA plasmids. Cultures were extracted after 24 h for analysis of palmitoylation by the biotin switch method and pull down with NeutrAvidin-agarose beads. Left panels show representative immunoblots (IB) of pull-down samples (top panel) and total lysate (bottom panel) for PSD-95. Omission of NH<sub>2</sub>OH before biotinylation resulted in minimal NeutrAvidin pull down as negative control for non-specific pull down. Right panel shows quantification of PSD-95 palmitoylation (mean  $\pm$  SEM,  $n = 3-4$  per condition from three independent experiments).
- B** Cultured cortical neurons were infected at 12 DIV with lentivirus for expression of both shRNA against PSD-95 (sh95) and sh-resistant PSD-95-EGFP WT, E17R, or T19K. Cultures were extracted at 17 DIV for immunoprecipitation (IP) and subsequent immunoblotting (IB) with antibodies against GluA1 (~100 kDa) and GluN2B (~180 kDa), showing comparable co-immunoprecipitations of GluA1 and GluN2B. Probing for GFP showed comparable loading for PSD-95-EGFP WT, E17R, and T19K. Shown are representative IBs. Similar results were obtained in three other cultures.
- C** Quantification of colocalization of endogenous surface GluA1 and the indicated PSD-95-EGFP variant in hippocampal neurons. Bar graph shows correlation coefficients for the colocalization indicating comparable colocalization of GluA1 with each of the PSD-95-EGFP variants. Mean  $\pm$  SEM, three dendritic segments from each of 32–34 neurons from three independent cultures were analyzed per condition.

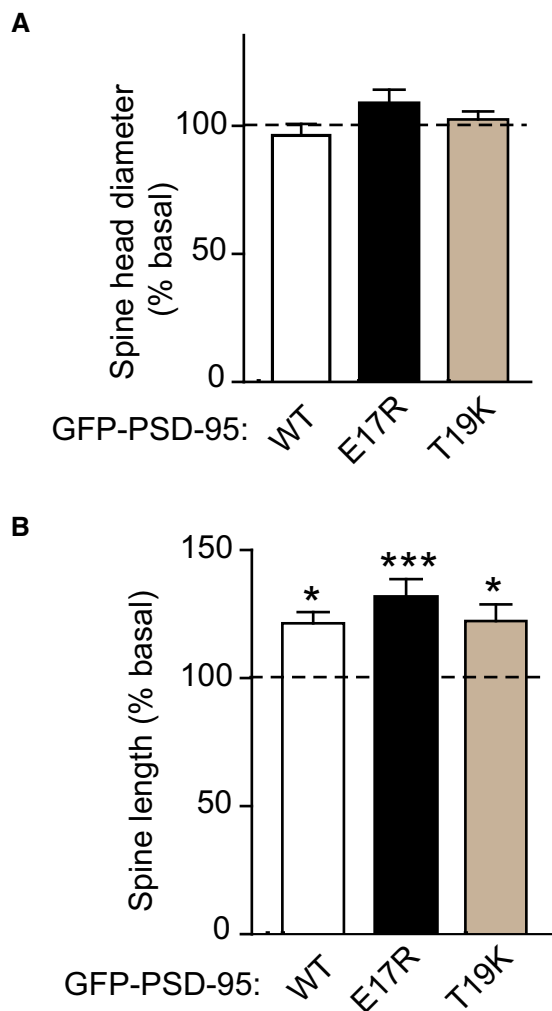

**Figure EV4. Chronic bicuculline treatment increases length of dendritic spines.**

A, B Cultured hippocampal neurons were co-transfected with mCherry and EGFP-tagged PSD-95 wild type (WT), E17R, or T19K at 10–11 DIV and treated with BIC (50  $\mu$ M) or left untreated at 17 DIV for 24–48 h before fixation. Spine head diameter (A) and length (B) were comparable for neurons expressing WT, E17R, or T19K PSD-95 under basal conditions (see Fig 6H and I). BIC treatment did not affect spine head diameter but increased spine length for all PSD-95-EGFP variants. Mean  $\pm$  SEM are shown. Statistical analysis was performed on  $n = 166$ –202 spines from 10 to 16 neurons per condition from three independent sets of cultures (\* $P < 0.05$ , \*\*\* $P < 0.001$ ; one-way ANOVA followed by Bonferroni's *post hoc* test; values for spine head diameter and length for basal conditions were those graphed in Fig 6H and I, respectively).

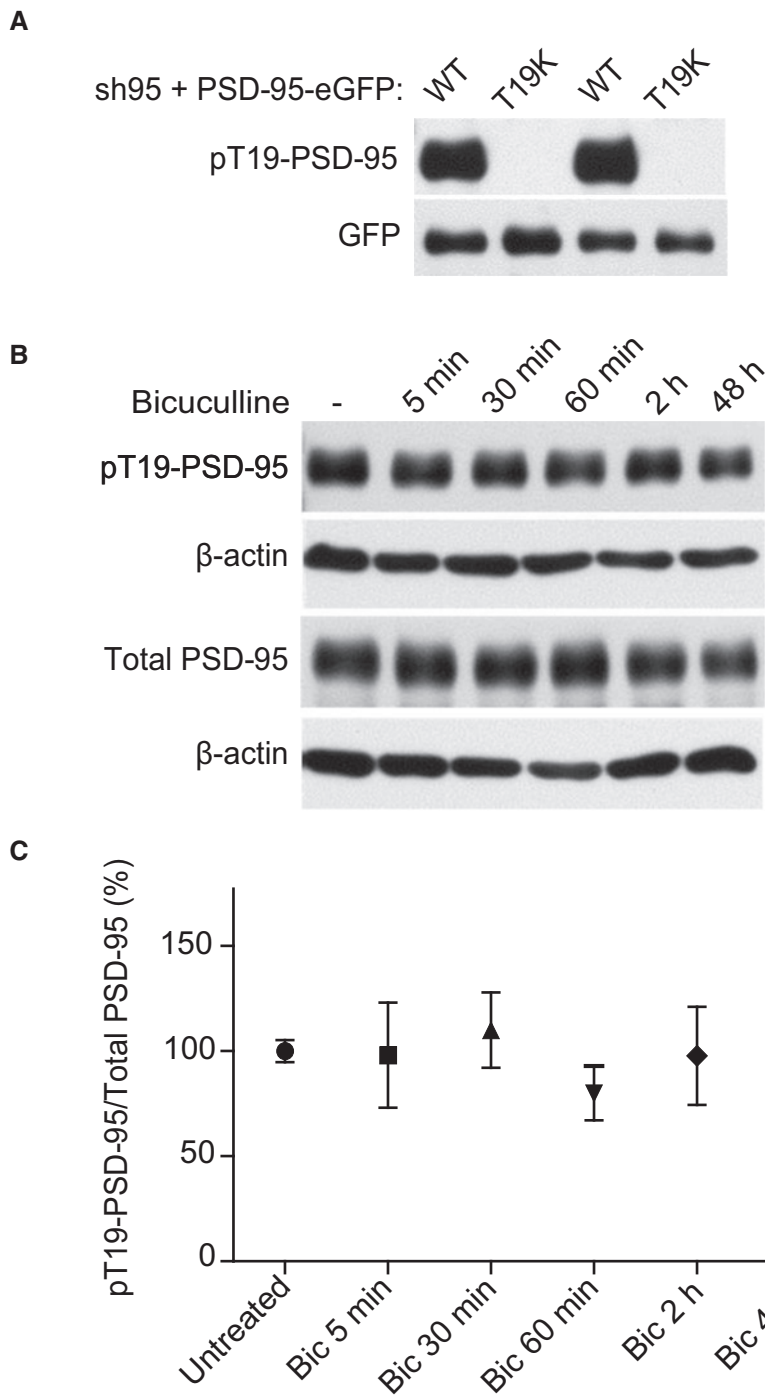

**Figure EV5. Bicuculline treatment does not alter PSD-95 phosphorylation at T19.**

**A** Cultured cortical neurons were infected at 12 DIV with lentivirus for expression of both shRNA against PSD-95 (sh95) and sh-resistant PSD-95-EGFP WT or T19K. Whole-cell lysates were prepared at 17 DIV and analyzed for pT19-PSD-95 levels by immunoblotting. Probing for GFP showed comparable loading for PSD-95-EGFP WT and T19K. No detection of pT19-PSD-95 signal corresponding to PSD-95-EGFP in T19K samples showed specificity of the antibody.

**B** Cultured cortical neurons (17 DIV) were either untreated or treated with BIC for the indicated time periods, and whole-cell lysates were analyzed for endogenous pT19-PSD95 and total PSD-95 levels by immunoblotting. Probing for  $\beta$ -actin showed comparable loading. Representative immunoblots are shown.

**C** Quantification of relative pT19-PSD-95 levels normalized to total PSD-95 (mean  $\pm$  SEM,  $n = 4-5$  per condition from three independent sets of cultures).
